# Supplementary material for: Tanzawaic acids isolated from a marine-derived fungus of the genus Penicillium with cytotoxic activities
Source: Royal Society of Chemistry journal article supplement (doi:10.1039/c5ob00773a), 2015-01-01

## Supplementary Information

# Tanzawaic acids from a marine-derived fungus of the genus *Penicillium* with cytotoxic activities

Faviola Cardoso-Martínez,<sup>a</sup> José M. de la Rosa,<sup>a</sup> Ana R. Díaz-Marrero,<sup>a,b</sup> José Darías,<sup>a</sup>  
Claudia Cerella,<sup>c</sup> Marc Diederich<sup>d</sup> and Mercedes Cueto<sup>\*a</sup>

<sup>a</sup>*Instituto de Productos Naturales y Agrobiología del CSIC, Avenida Astrofísico F. Sánchez, 3, 38206 La Laguna, Tenerife, Spain*

<sup>b</sup>*Present address: Department of Organic Chemistry, University Institute of Bio-Organic Chemistry "Antonio González" (CIBICAN), University of La Laguna, 38206 Tenerife, Spain.*

<sup>c</sup>*Laboratoire de Biologie Moléculaire et Cellulaire de Cancer, Hôpital Kirchberg, Rue Edward Steichen 9, 2540 Luxembourg, Luxembourg*

<sup>d</sup>*College of Pharmacy, Seoul National University, 1 Gwanak-ro, Gwanak-gu, Seoul 151-742, Korea*

*\*e-mail: mcueto@ipna.csic.es*

### INDEX:

|                                                                               |    |
|-------------------------------------------------------------------------------|----|
| <sup>1</sup> H NMR spectrum of tanzawaic M ( <b>1</b> ) in CDCl <sub>3</sub>  | S2 |
| <sup>13</sup> C NMR spectrum of tanzawaic M ( <b>1</b> ) in CDCl <sub>3</sub> | S3 |
| <sup>1</sup> H NMR spectrum of tanzawaic N ( <b>2</b> ) in CDCl <sub>3</sub>  | S4 |
| <sup>13</sup> C NMR spectrum of tanzawaic N ( <b>2</b> ) in CDCl <sub>3</sub> | S5 |
| <sup>1</sup> H NMR spectrum of tanzawaic O ( <b>3</b> ) in CDCl <sub>3</sub>  | S6 |
| <sup>13</sup> C NMR spectrum of tanzawaic O ( <b>3</b> ) in CDCl <sub>3</sub> | S7 |
| <sup>1</sup> H NMR spectrum of tanzawaic P ( <b>4</b> ) in CDCl <sub>3</sub>  | S8 |
| <sup>13</sup> C NMR spectrum of tanzawaic P ( <b>4</b> ) in CDCl <sub>3</sub> | S9 |

$^1\text{H}$  NMR of tanzawaic M (**1**) in  $\text{CDCl}_3$

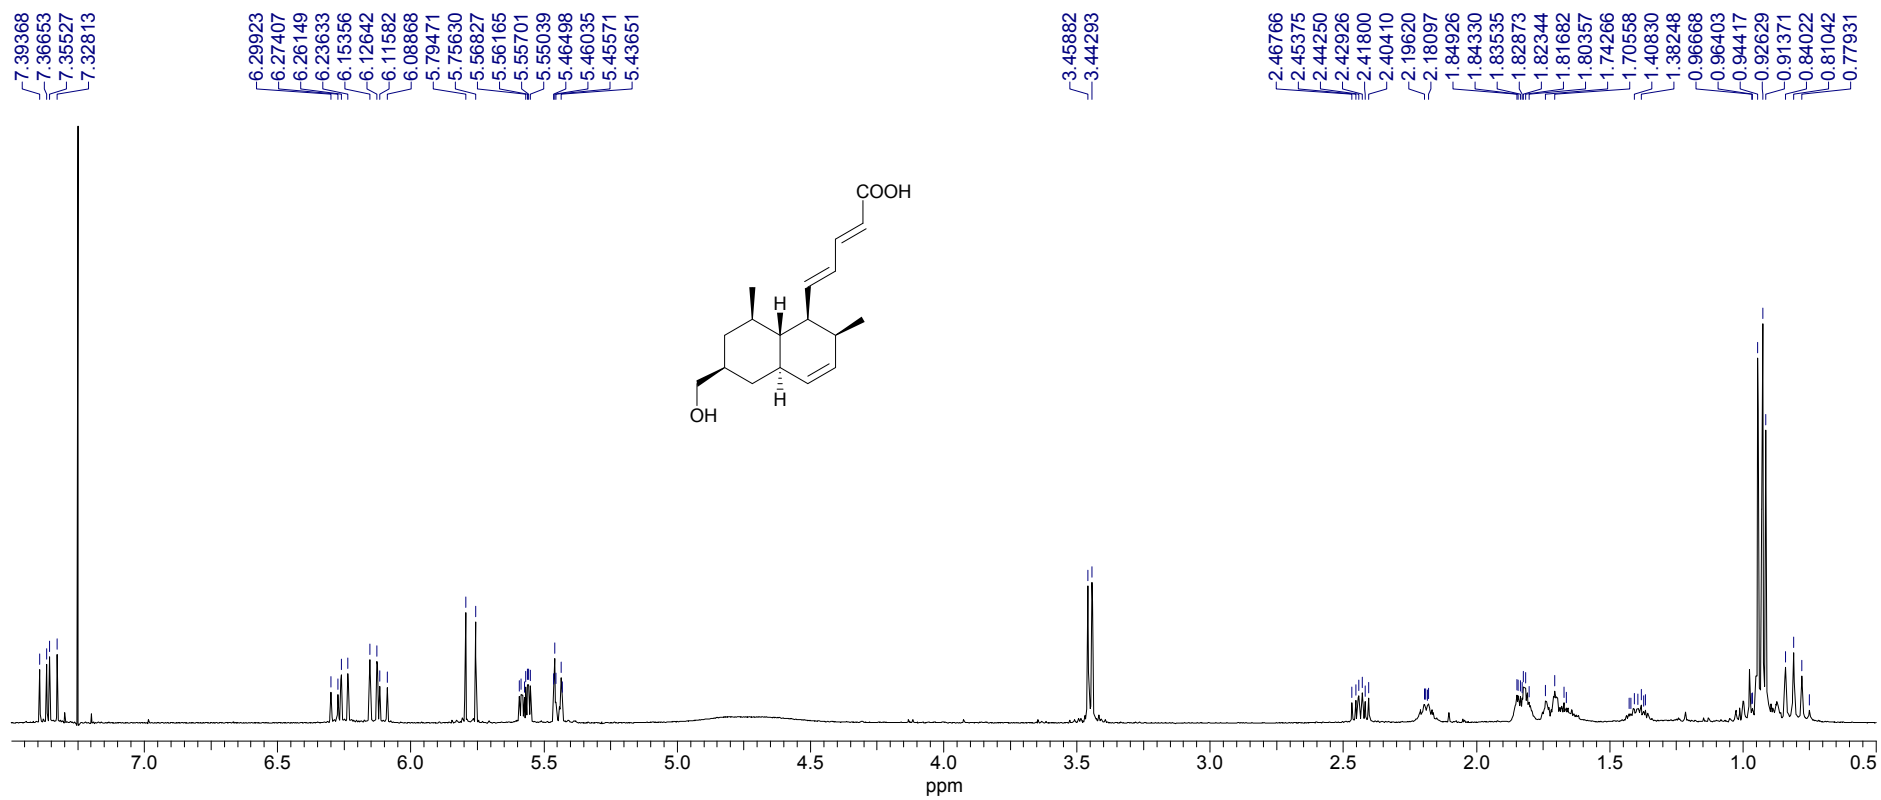

$^{13}\text{C}$  NMR spectrum of tanzawaic M (1) in  $\text{CDCl}_3$

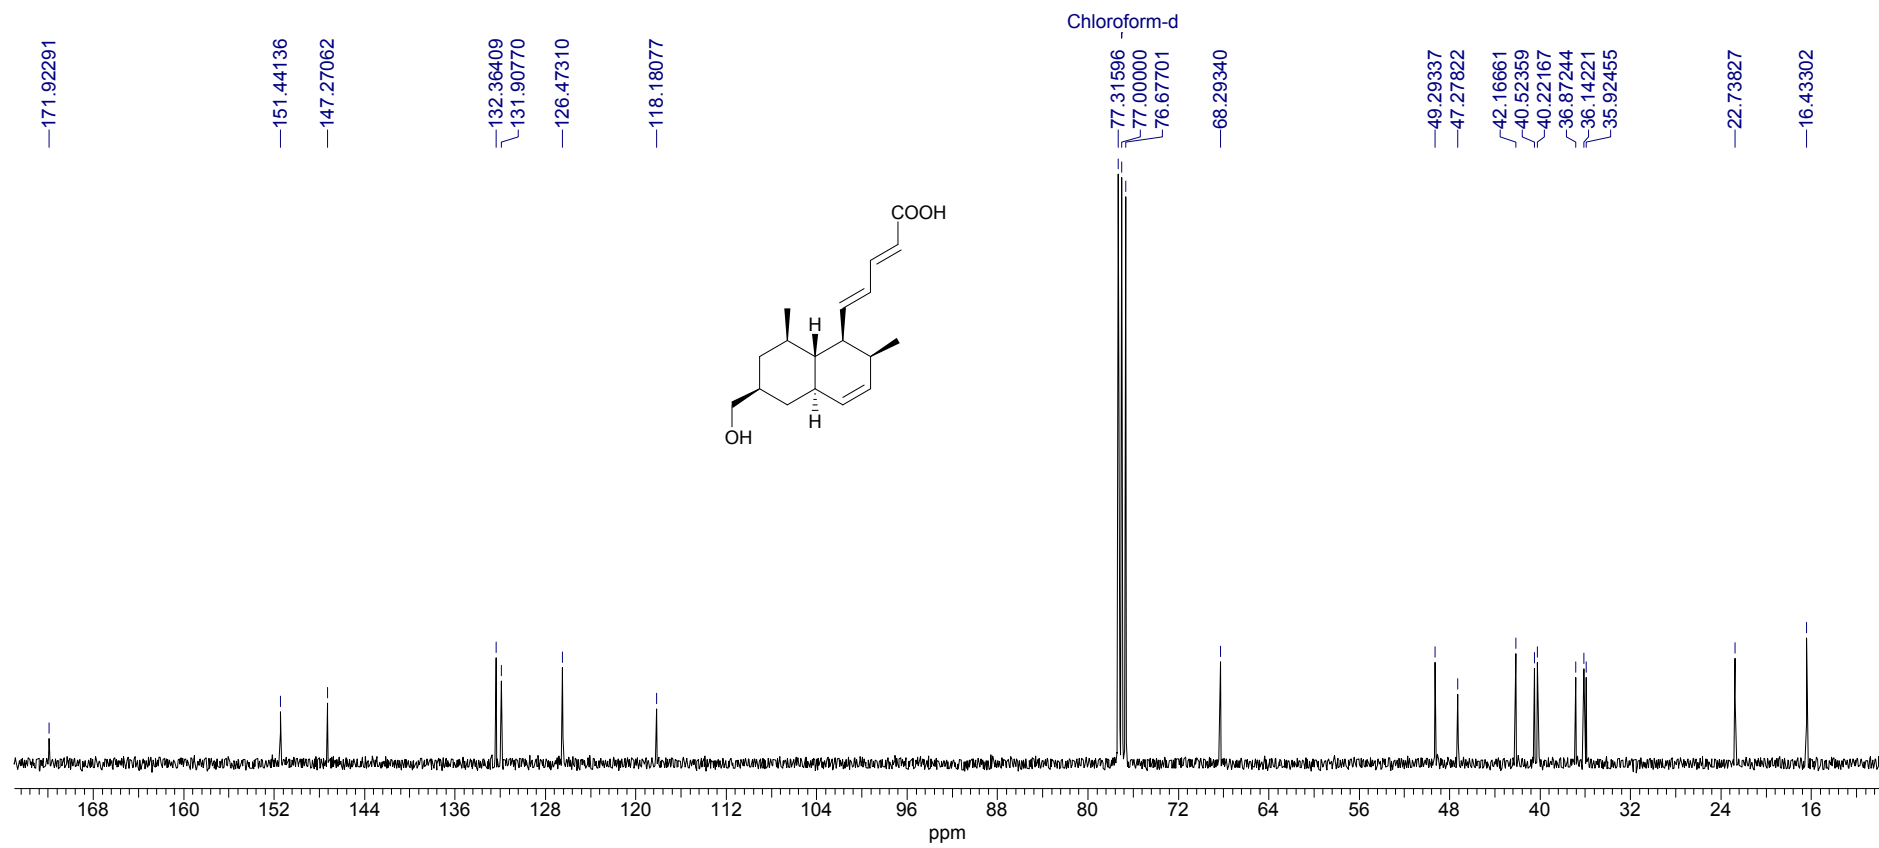

$^1\text{H}$  NMR spectrum of tanzawaic N (**2**) in  $\text{CDCl}_3$

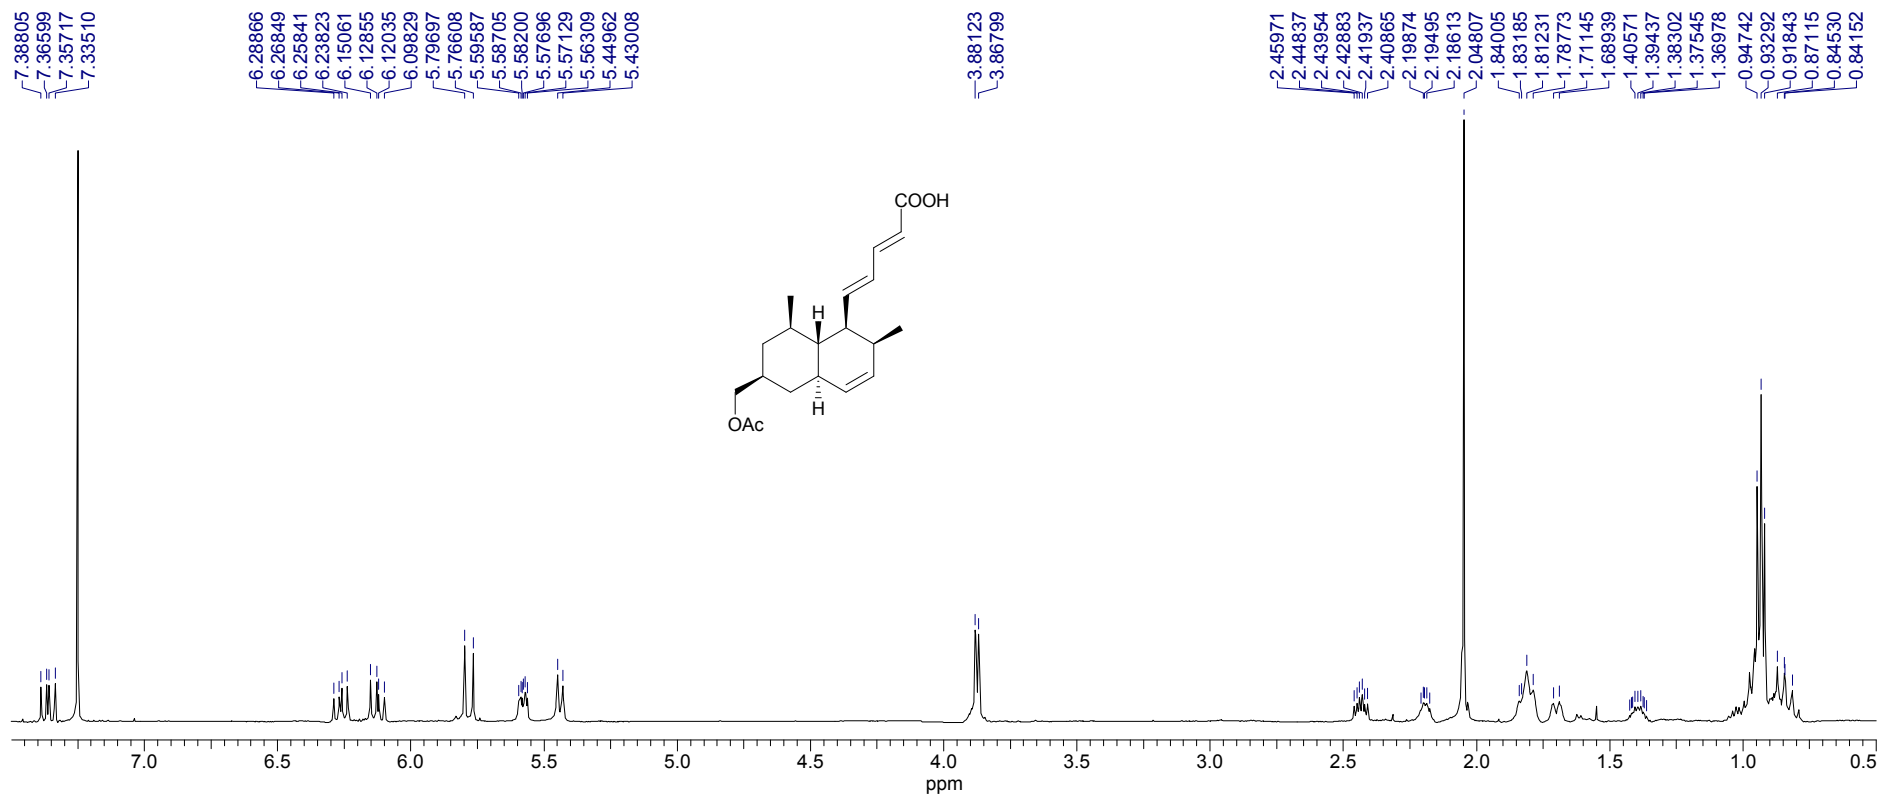

<sup>13</sup>C NMR spectrum of tanzawaic N (2) in CDCl<sub>3</sub>

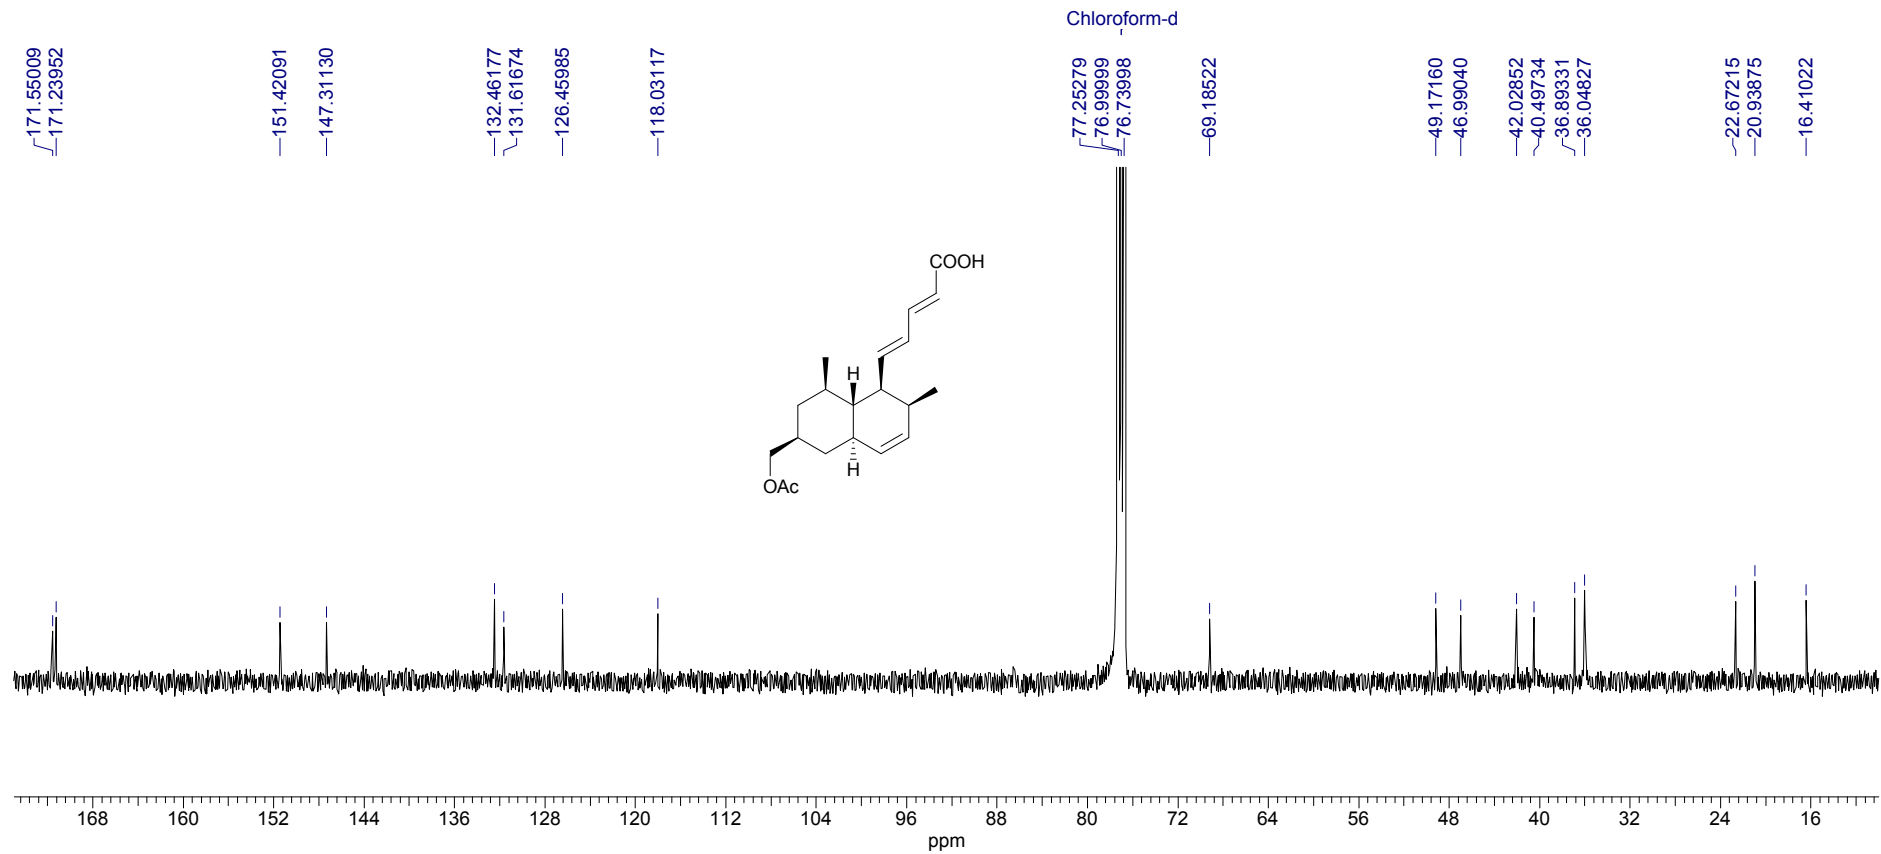

<sup>1</sup>H NMR spectrum of tanzawaic O (**3**) in CDCl<sub>3</sub>

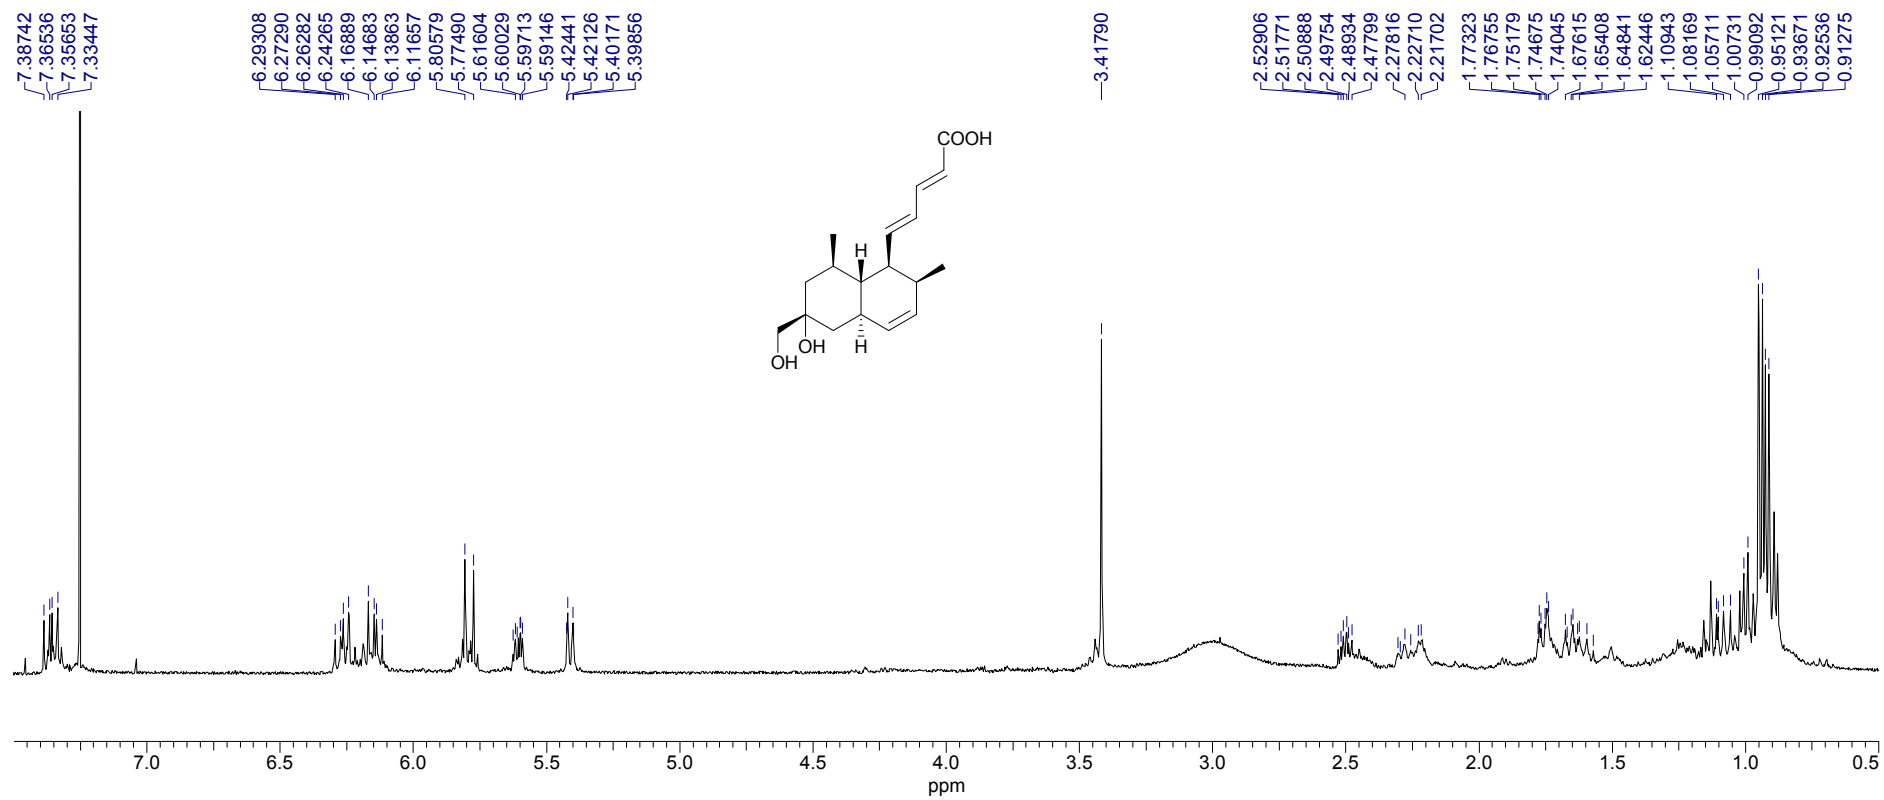

<sup>13</sup>C NMR spectrum of tanzawaic O (**3**) in CDCl<sub>3</sub>

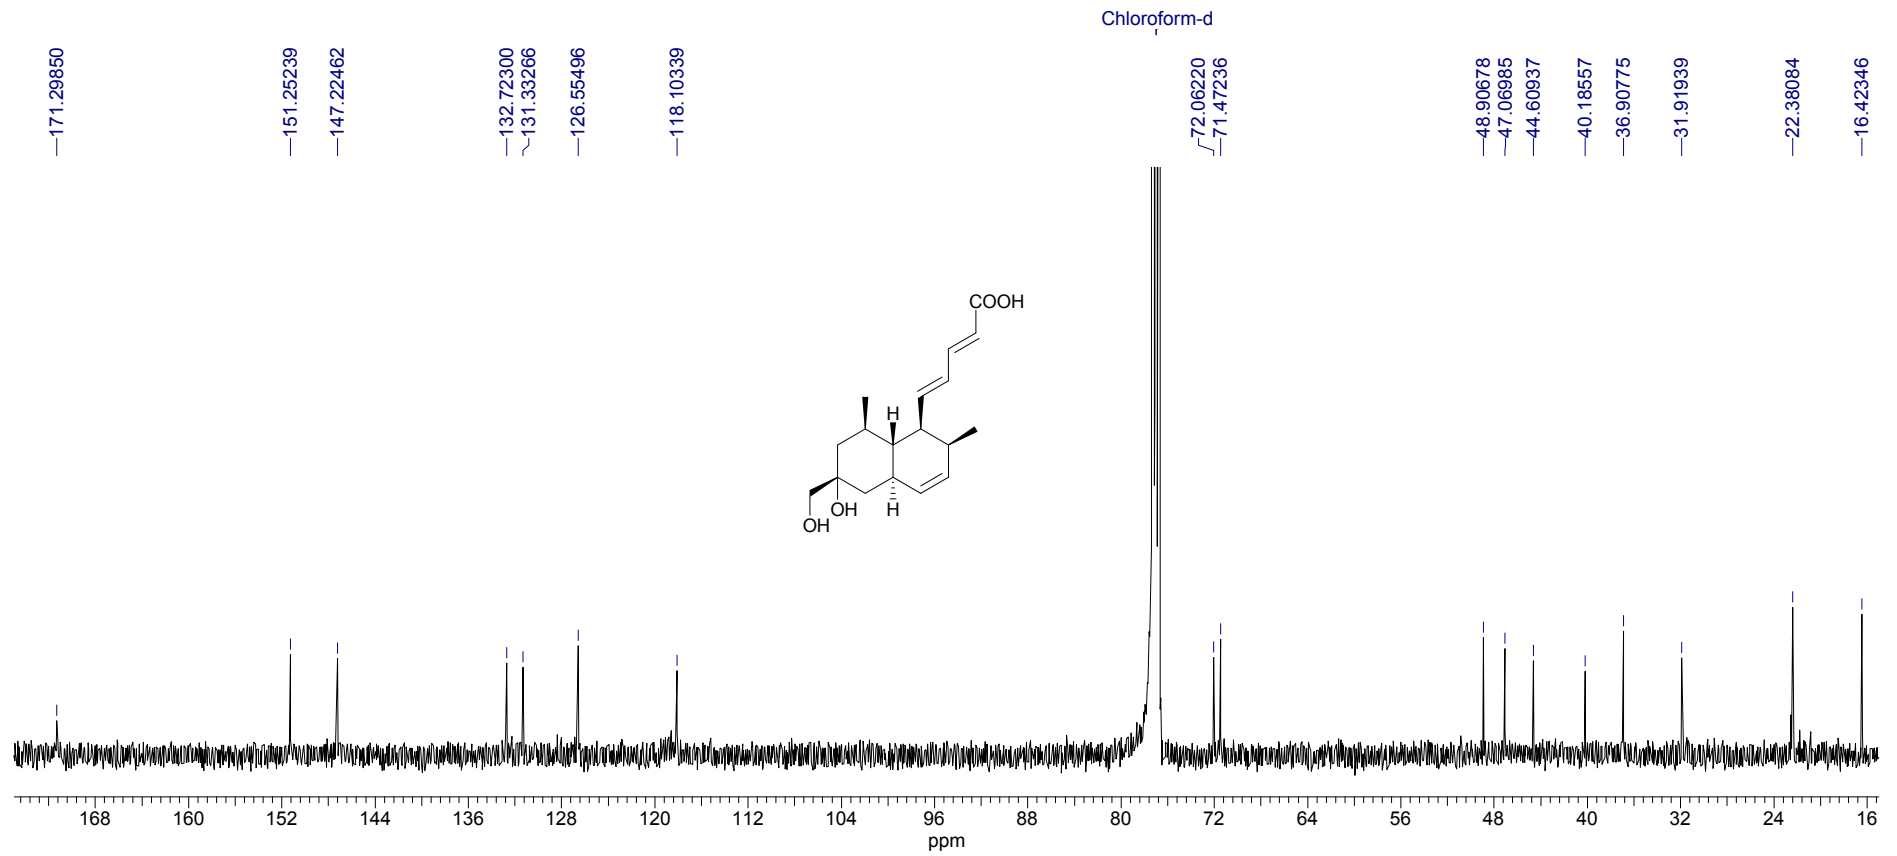

<sup>1</sup>H NMR spectrum of tanzawaic P (**4**) in CDCl<sub>3</sub>

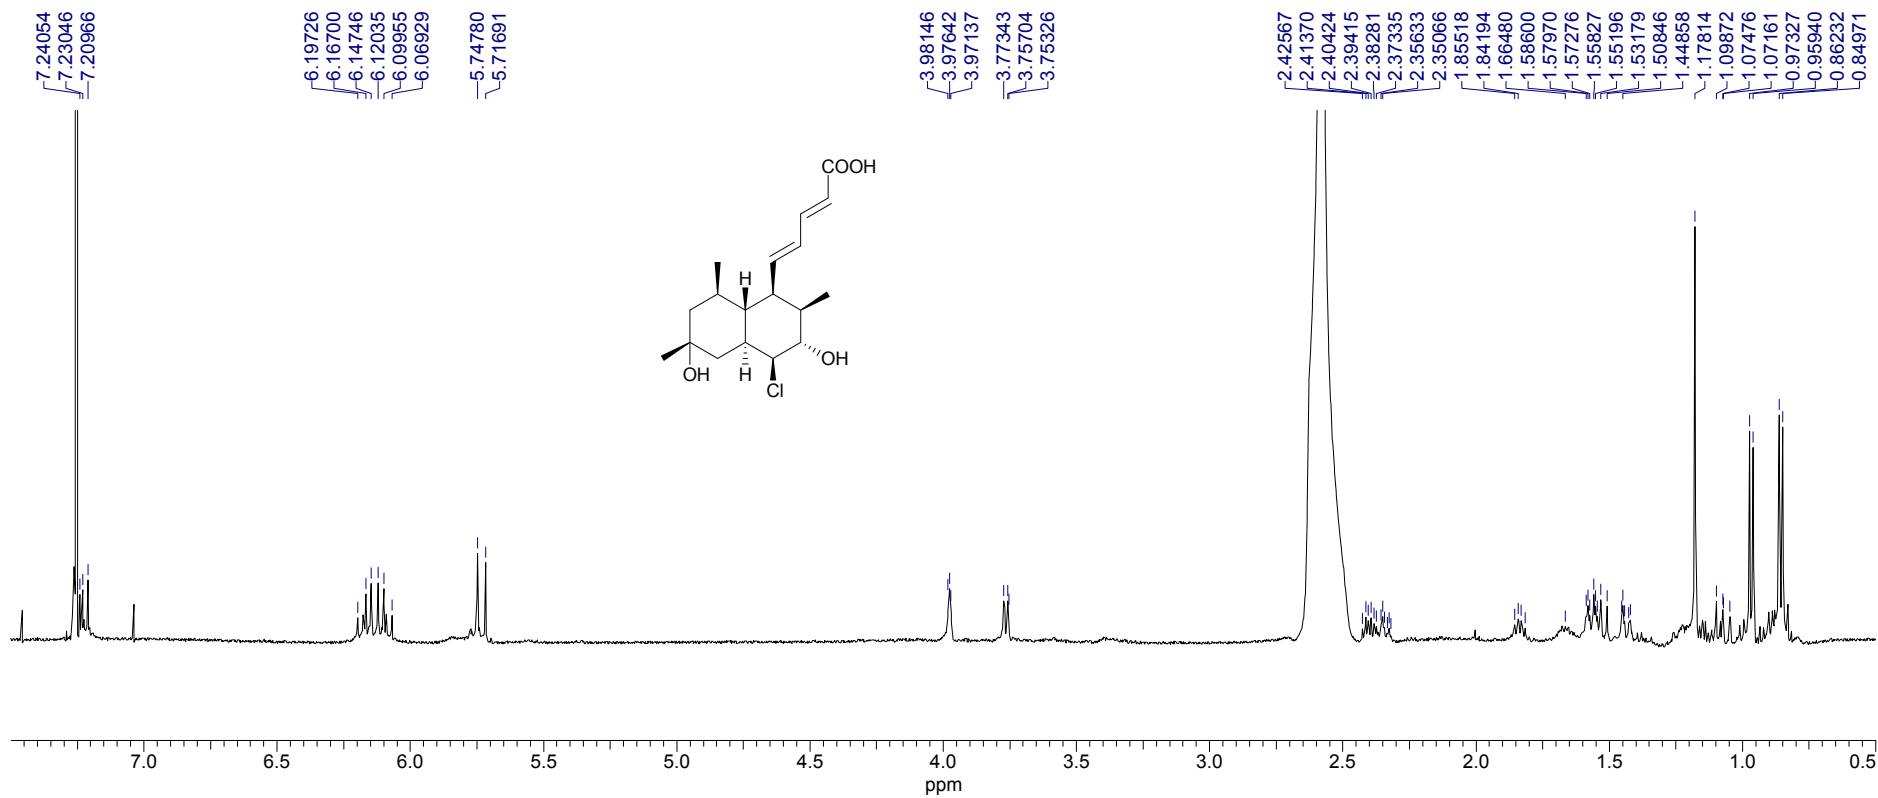



<sup>13</sup>C NMR spectrum of tanzawaic P (4) in CDCl<sub>3</sub>

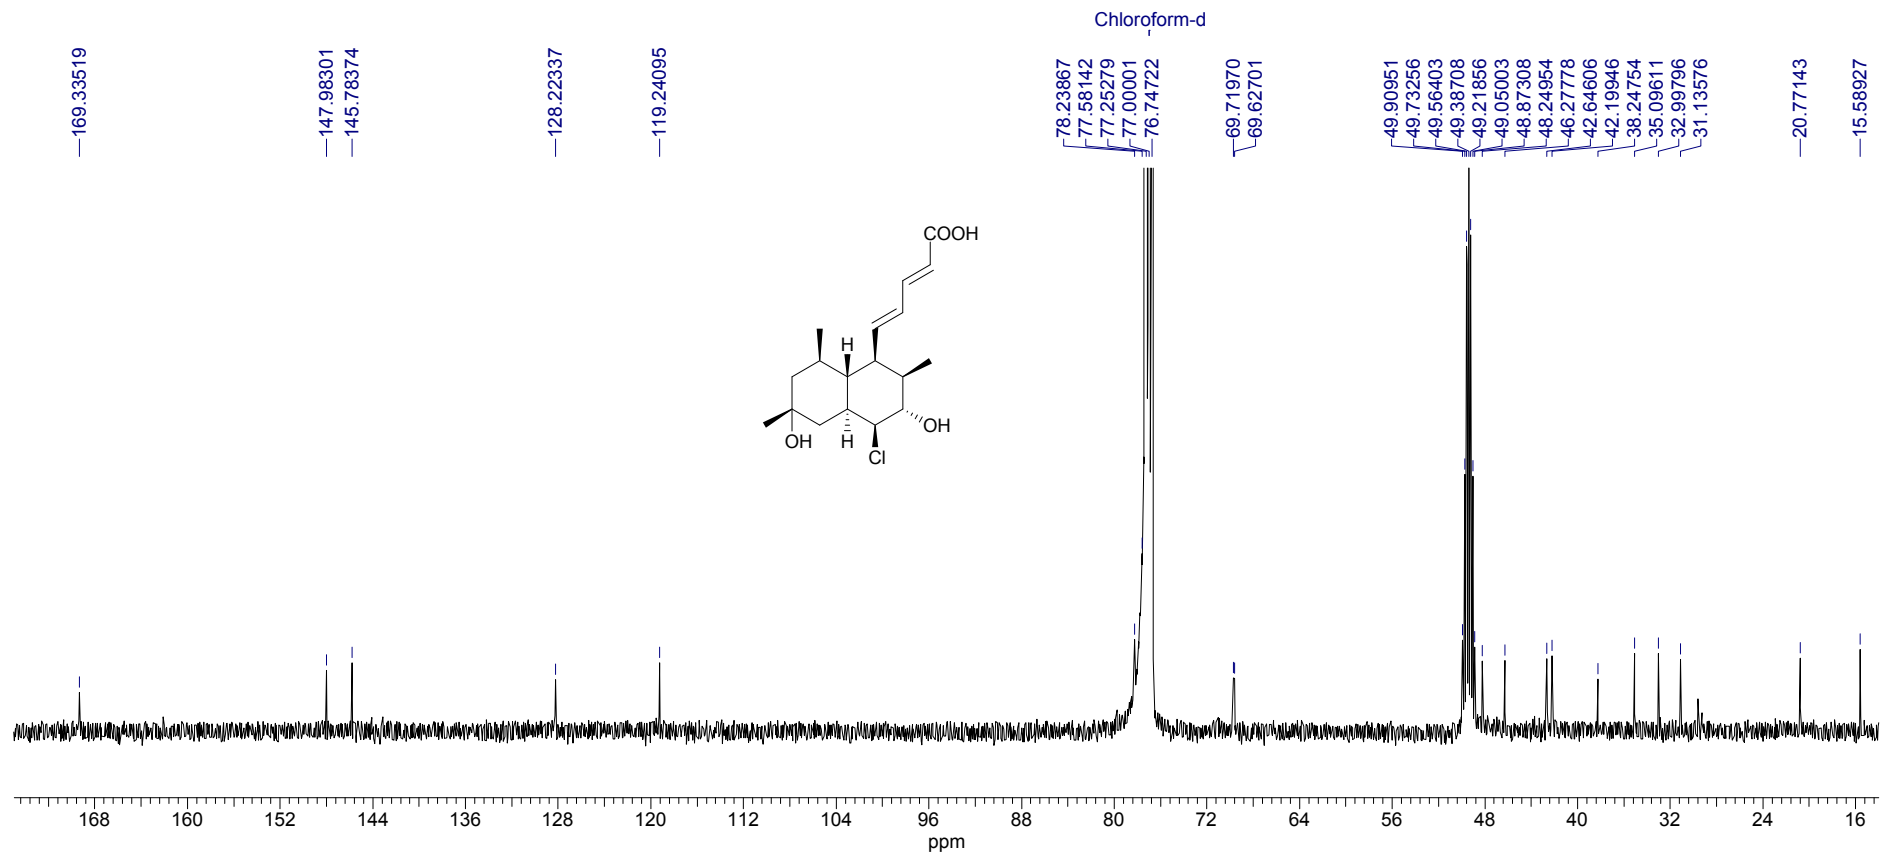

Supplement: c5ob00773a1.pdf [file c5ob00773a1.pdf]
